# Rating enrichment items by group-housed laboratory mice in multiple binary choice tests using an RFID-based tracking system

Ute Hobbiesiefken<sup>1</sup>, Birk Urmersbach<sup>1</sup>, Anne Jaap<sup>1</sup>, Kai Diederich<sup>1</sup>, Lars Lewejohann<sup>\*1,2</sup>

<sup>1</sup>German Federal Institute for Risk Assessment (BfR), German Center for the Protection of Laboratory Animals (Bf3R), Max-Dohrn-Straße 8-10, D-10589 Berlin, Germany

<sup>2</sup>Institute of Animal Welfare, Animal Behavior and Laboratory Animal Science, Freie Universität Berlin, Königsweg 67, D-14163 Berlin, Germany

\*Corresponding author

E-Mail: Lars.Lewejohann@bfr.bund.de

## Abstract

There is growing evidence that enrichment of housing conditions of laboratory animals has positive effects on behavior, growth, and health. Laboratory mice spend most of their lives in their housing rather than in experimental apparatus, so improving housing conditions is a first-choice approach to improving their welfare. Despite the increasing popularity of enrichment, little is known about whether it is also perceived as being beneficial from the animal's point of view. This is especially true due to the fact that 'enrichment' has become an umbrella term that encompasses a wide variety of different elements. Therefore, we categorized enrichment items according to their prospective use into the categories 'structural', 'housing', and 'foraging'. In multiple binary choice tests we let 12 female C57BL/6J mice chose and rank 5 enrichment items per category. All possible pair combinations of enrichment items within each category were presented counterbalanced for a 46-hour period in a home cage based system consisting of two interconnected cages. A new analyzing method combined the binary decisions and ranked the enrichment items within each category by calculating worth values and consensus errors. Mice ranked the lattice ball (foraging), the rope (structural) and the second plane (structural) in upper positions. No clear preferences were determined for different types of housing enrichment during inactive times (light phase) whereas these objects were actively explored during the dark phase. Here the floorhouse and the paperhouse revealed high worth values. Overall, a high consensus error in ranking positions was observed reflecting strong individual differences in preferences. This highlights the importance of a varied enrichment approach as not all mice prefer the same item at all times. Given the known overall beneficial effects of enrichment, these data will help to provide appropriate enrichment elements to improve animal welfare and refine animal experimentation.

**Keywords:** laboratory mouse, environmental enrichment, housing conditions, animal welfare, preference testing, C57BL/6J mice

## 43 Introduction

44 Attitudes toward animals as fellow living creatures have changed significantly in recent  
45 decades. There is growing concern about the conditions under which laboratory animals are  
46 kept, and it is therefore not surprising that legal requirements are also becoming increasingly  
47 demanding. In Europe, minimum requirements for housing laboratory animals are set out in  
48 EU Directive 2010/63<sup>1</sup>, which stipulates that animals must be housed according to the specific  
49 needs and characteristics of each species. Experimental animals should be provided with  
50 ‘space of sufficient complexity to allow expression of a wide range of normal behavior’.  
51 While the available space itself is a pressing issue for future improvements, the issue of  
52 complexity is usually approached through what is known as ‘enrichment of housing  
53 conditions’. It is reasonable to assume that additional enrichment opportunities in barren  
54 cages will create a more complex environment, which is likely to be appreciated by the  
55 animals<sup>2,3</sup> and they are even willing to work for access to enrichment opportunities<sup>4</sup>.

56 However, it is important to note that ‘enrichment’ has become an umbrella term that  
57 encompasses a wide variety of different elements. Therefore, it must be kept in mind that by  
58 no means a uniformly accepted enrichment is meant when speaking of effects of enrichment  
59 <sup>2,3,5</sup>. This being said, many research groups have indeed shown the benefits of enriched  
60 environments relative to conventional housing on well-being parameters in mice <sup>3,6</sup>.  
61 Abnormal repetitive behavior expression, behavioral measures of anxiety, as well as growth  
62 and stress physiology were influenced positively by providing mice with a more varying  
63 environment using enrichment items <sup>7</sup>. Access to enrichment lead to improved learning and  
64 memory function <sup>8,9</sup>, increased hippocampal neurogenesis <sup>9,10</sup>, attenuated stress responses and  
65 enhanced natural killer cell activity <sup>11</sup>. Importantly studies showed no generalizable influence  
66 of a more diverse environment on variability of important parameters in biomedical research  
67 in mice <sup>12-14</sup>. With regard to the workload of animal caretakers only a slight increase was  
68 noted while their overall assessment of providing enrichment in light of enhanced well-being  
69 for laboratory rodents was reported as good <sup>15</sup>. Vice versa, there is increasing evidence, that  
70 keeping animals in standard housing conditions may be the negative factor in the development  
71 of behavioral disorders because of its impoverished character <sup>16</sup>.

72 To create a more varied and stimulating environment, the size of the home cage can be  
73 enlarged, the group size increased, and stimulating elements can be provided <sup>17,18</sup>. However,  
74 the human perspective does not necessarily reflect the wants and needs of mice<sup>2</sup>. Therefore, it  
75 is essential to ask the animals themselves about the adequacy of the enrichment items <sup>19,20</sup>. To  
76 determine how different items are perceived by the animals themselves <sup>21</sup>, animal centric  
77 strategies like preference tests will help to assess and rate different items <sup>20,22-24</sup>.

78 From the three typically used preference testing designs <sup>23</sup>, T-Maze, conditioned place  
79 preference, and home cage based preference tests, the last one seems to be the most  
80 appropriate for rating enrichment items. Especially when it comes to the avoidance of  
81 frequent animal handling and the opportunity to extend testing periods up to include a full  
82 circadian cycle or longer <sup>23</sup>. Additionally, choice tests conducted within the home cage  
83 without the influence of an experimenter <sup>25,26</sup> correspond better to real laboratory keeping  
84 conditions. Home cage based testing systems usually consist of two <sup>27,28</sup> or more <sup>29,30</sup>  
85 connected cages with or without a center cage. In such tests mice are able to stay in their  
86 preferred surrounding and the cage that is chosen with the longer period of stay is regarded as  
87 the preferred one, or, in case of aversive properties, as the one least avoided <sup>23</sup>.

88 For our preference test, we used the Mouse Position Surveillance System (MoPSS), a new test  
89 system designed and constructed in our laboratory <sup>31</sup> to ask for enrichment item preferences in  
90 female C57BL/6J mice, a widely used strain in biomedical research<sup>32</sup>. The MoPSS allows

91 automatic long-term calculation of time spent in each of two interconnected cages for every  
92 individual mouse in a group. The determined dwelling time is used to conclude the choice  
93 between different enrichment items from the point of view of a mouse. The offered items  
94 were categorized and tested by their intended purpose of structuring the cage (structural  
95 enrichment), stimulating foraging engagement of the mice (foraging enrichment), and  
96 providing an alternative resting place (housing enrichment). To rank multiple items, we  
97 combined multiple binary choice tests and calculated worth values<sup>33</sup>. In order to further  
98 evaluate the quality with regard to consistency of choice among individual mice and within  
99 groups of mice living in the same cage we used a recently developed method for analyzing  
100 worth value ratings<sup>34</sup>. The overall aim of assigning worth values to specific enrichment items  
101 by comparison, is to provide scientifically based assistance for improving housing conditions  
102 of laboratory mice and thus increase animal welfare.

103

## 104 **Results**

### 105 *Preference testing*

106 The relative preferences (worth values, ranging from 0 to 1) and consensus errors (percentage  
107 of disagreement) of all 12 mice for the enrichment items of the categories foraging, structural,  
108 and housing during the entire 46-hours testing cycle and during active and inactive time are  
109 given in Figure 1.

110 Mice preferred the lattice ball over all other *foraging enrichment* items during the 46-hour  
111 testing interval (mean worth value (WV): 0.51; consensus error (CE): 29.17 %), both during  
112 active (WV: 0.47; CE: 33.3 %) and inactive time (WV: 0.42; CE: 45.83 %).

113 Over the total time of 46 hours, the highest worth values regarding the *structural enrichments*  
114 were attributed to the rope (WV: 0.42; CE: 45.83 %). However, during the active time the  
115 second plane (WV: 0.42; CE: 45.83 %) was preferred while during the inactive time both, the  
116 second plane (WV: 0.25; CE: 75 %) and the rope (WV: 0.25; CE: 50 %) reached the highest  
117 worth values.

118 Out of the *housing enrichments* all mice preferred the floorhouse over 46 hours (WV: 0.27;  
119 CE: 45.83 %) and within the active time (WV: 0.34; CE: 45.83 %). During the inactive time  
120 the floorhouse (WV: 0.21; CE: 79.17 %) and the houseball (WV: 0.21; CE: 79.17 %) were  
121 equally ranked on first position.

122 Figure 2 illustrates the relative preferences (worth values) of the mice of *Group 1* (n=4),  
123 *Group 2* (n=4) and *Group 3* (n=4) for the enrichment items of the categories foraging,  
124 structural and housing during the entire 46-hours testing cycle.

125 Within the *foraging enrichments* group 1 ranked the lattice ball (WV: 0.36) and the tube with  
126 stones (WV: 0.36) on the first position, whereas group 2 and 3 ranked solely the latticeball  
127 (group 2 WV: 0.41; group 3 WV: 0.6) on the first position.

128 Among the *structural enrichments* group 1 ranked the rope (WV: 0.35) and the second plane  
129 (WV: 0.35) on the first position, group 2 ranked the rope (WV: 0.28) first and group 3 ranked  
130 the clip with the plastic tube (WV:0.47) first.

131 Analyzing the ranking positions of the *housing enrichments* on group level, group 1 ranked  
132 the floorhouse (WV: 0.34), group 2 the paperhouse (WV:0.49) and group 3 the wooden angle  
133 (WV:0.49) on the first position.

134

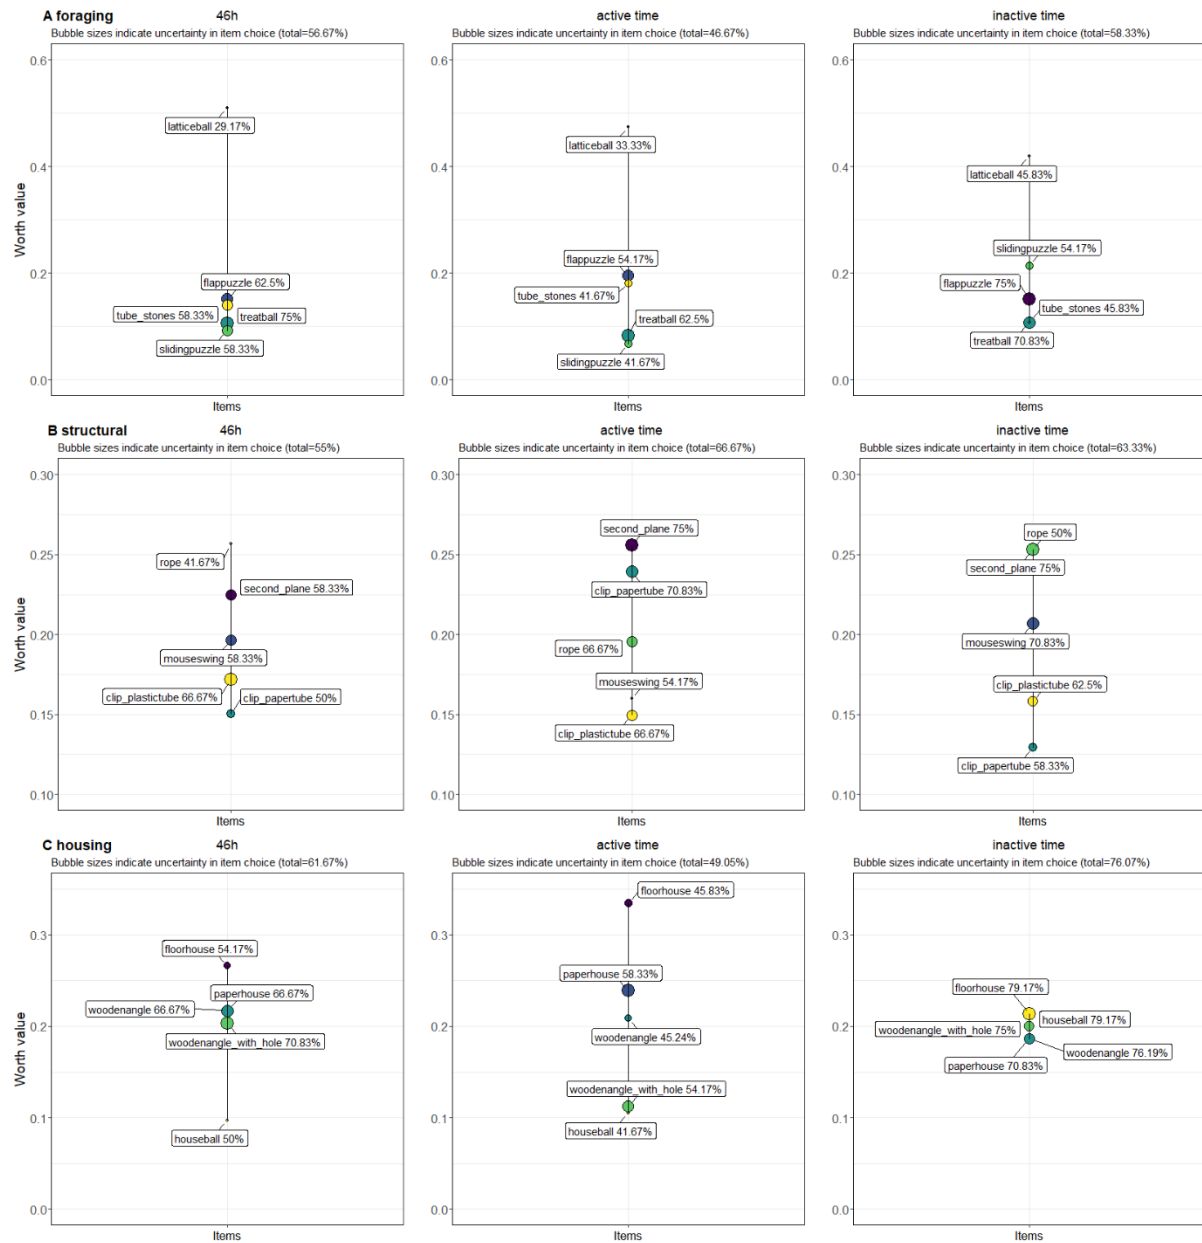

135

136 **Figure 1.** The relative preferences (worth values) and consensus errors (in percent) of all mice  
 137 (n=12) for the tested enrichment items from the categories foraging, structural and housing in  
 138 the single paired comparisons. The 46-hour period depicts the hole testing cycle whereas the  
 139 active time depicts the dark phase of the testing cycle and the inactive time depicts the light  
 140 phase of the testing cycle.

141

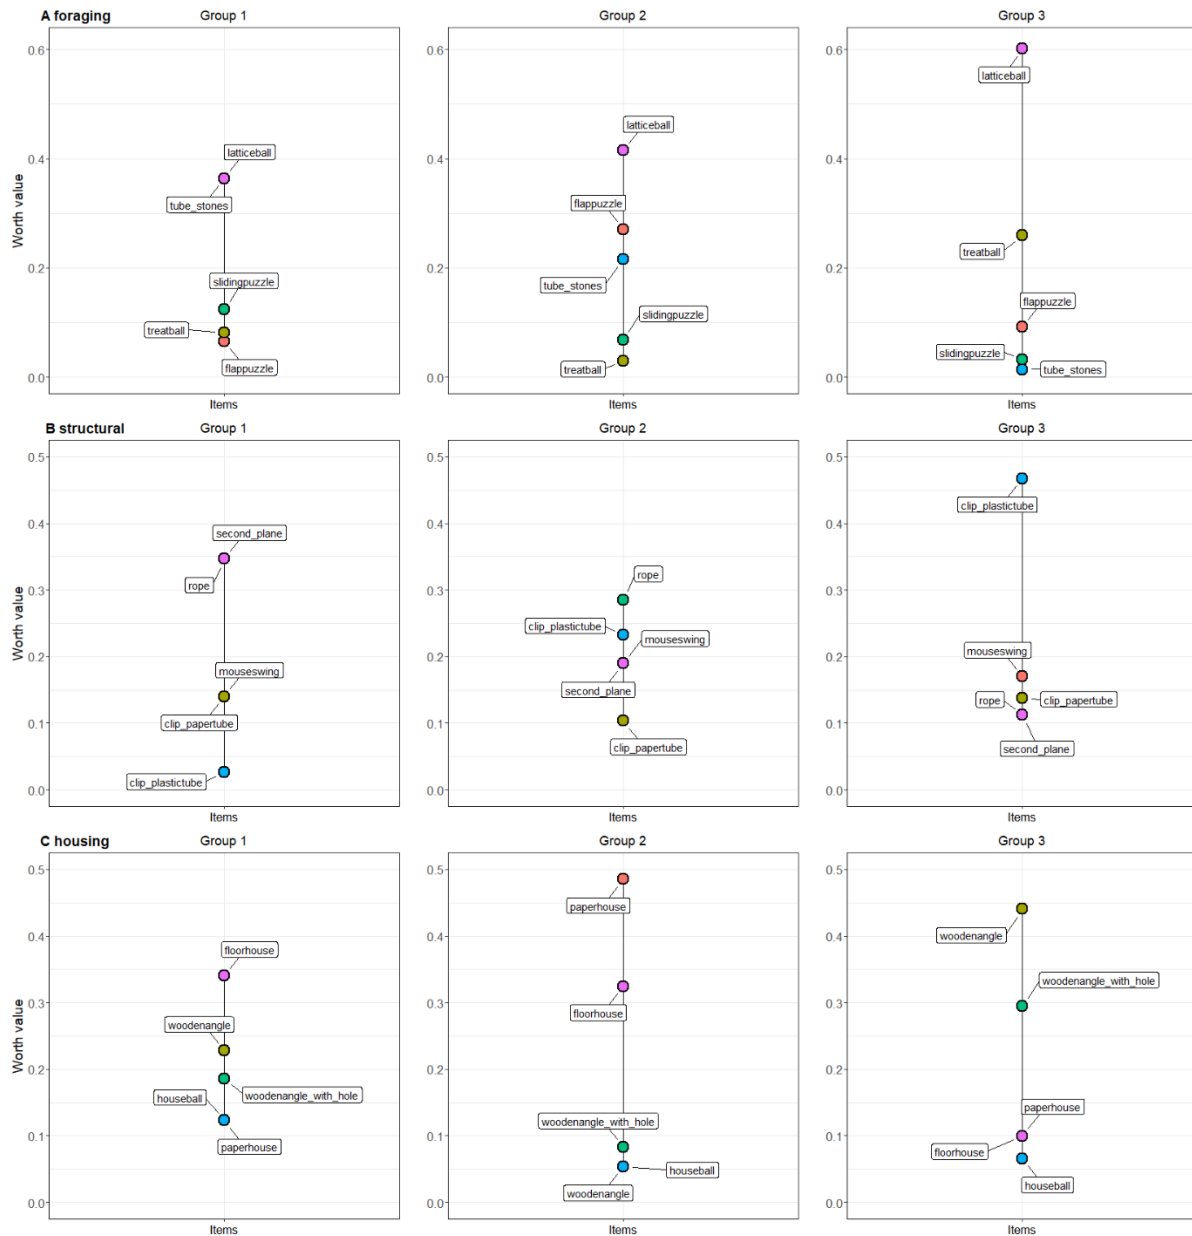

142

143 **Figure 2.** The relative preferences (worth values) of the mice from *Group 1* (n=4), *Group 2*  
144 (n=4) and *Group 3* (n=4) for the tested enrichment items from the categories foraging,  
145 structural and housing in the single paired comparisons over the entire 46-hour testing cycle.

146

147

148 **Sample Size**

149 Table 1 presents the results of the follow events, the influence events and the proportion of  
150 follow events and influence events of the transitions per mouse.

151 The mean proportion of follow events in the transitions was 1.39% and the proportion of  
152 influence events in the transitions was 1.31%. If the follow interval was increased to 3 s, the  
153 proportion of follow events increased to 4.73 %.

154 Figure 3 depicts the ratio of follow and influence rate for all mice. Six mice showed very  
155 similar numbers of influence and follow events. Accordingly, they are close to the dividing  
156 line with the straight line slope of 1. Whereas the other six mice diverged from the dividing  
157 line either towards higher influence ratio or higher follow ratio. The proportion of follow  
158 events was lowest in the mice of group 1 and highest in group 2. Overall, the three groups  
159 appear to cluster, with animal within the same cage showing more similar scores than animals  
160 from different cages.

161

162 **Table 1.** The results from the follow and influence behavior analysis of 12 mice from the  
163 three experimental groups (1,2,3) of the complete data set.

| Group | Mouse | Transitions | Follow Events | Follow % | Influence Events | Influence % |
|-------|-------|-------------|---------------|----------|------------------|-------------|
| 1     | 1     | 11608       | 69            | 0.594    | 68               | 0.586       |
| 1     | 2     | 11132       | 54            | 0.485    | 73               | 0.656       |
| 1     | 3     | 10919       | 77            | 0.705    | 58               | 0.531       |
| 1     | 4     | 9955        | 58            | 0.583    | 59               | 0.593       |
| 2     | 1     | 10387       | 229           | 2.205    | 183              | 1.762       |
| 2     | 2     | 10224       | 199           | 1.946    | 193              | 1.888       |
| 2     | 3     | 8442        | 207           | 2.452    | 213              | 2.523       |
| 2     | 4     | 7557        | 143           | 1.892    | 189              | 2.501       |
| 3     | 1     | 7480        | 93            | 1.243    | 81               | 1.083       |
| 3     | 2     | 8440        | 97            | 1.149    | 96               | 1.137       |
| 3     | 3     | 7428        | 88            | 1.185    | 89               | 1.198       |
| 3     | 4     | 6013        | 64            | 1.064    | 76               | 1.264       |

164

165

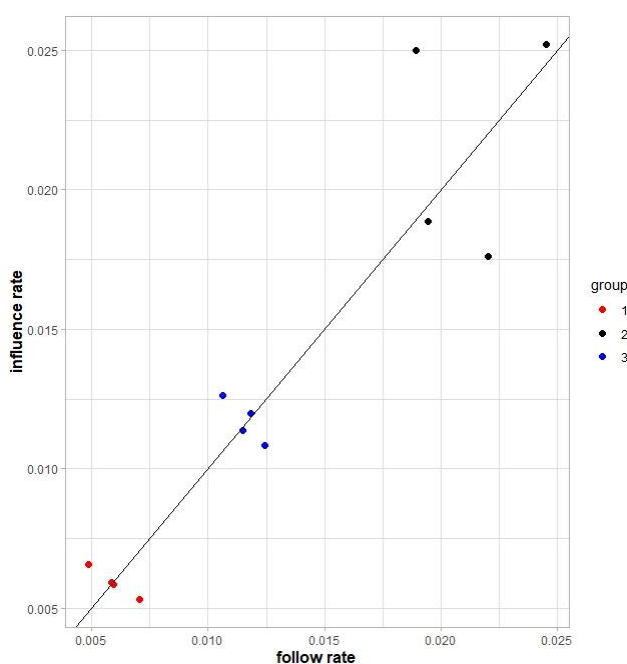

166

167 **Figure 3.** The ratio of the follow rate and influence rate from the follow and influence  
168 behavior analysis of 12 mice from the three experimental groups (1,2,3) of the complete data  
169 set.

170

## 171 **Discussion**

172 The aim of this study was the evaluation of enrichment elements from the perspective of  
173 group housed female C57BL/6J mice. In a series of home cage based binary preference tests,  
174 mice could choose between different enrichment elements. The combined data were used to  
175 rank the items according to their worth value and to calculate the degree of disagreement in  
176 item selection between mice measured as consensus error (CE).

177 All choice tests were performed while the mice were in their respective social group in one  
178 out of three cages with four mice each. We conducted an analysis of follow and influence  
179 behavior, which shows how attached individual choice is to decisions of conspecifics. Data  
180 revealed that the three groups indeed did not come to the same conclusion with regard to  
181 choosing preferred items. However, there was no considerable attraction to individual mice  
182 that could explain the respective preference as a trend triggered by individual influencer mice.  
183 Overall, a mean follow rate of 1.39 % is reflecting a negligible direct impact on individual  
184 choices. Even if a more conservative follow interval was applied, more than 95% of all cage  
185 changes were not directly related to an influencer. Thereby we could demonstrate that group  
186 housed mice can explore a choice test apparatus without being directly led by others and thus  
187 an independent choice is likely. Nevertheless, testing groups of mice will remain a  
188 challenging issue with regard to choosing the correct statistical unit<sup>31,35,36</sup>. Especially during  
189 the inactive phase, the location of a shared nest might influence the choice of the group. Mice  
190 are social animals in nature, and in accordance to underlying legislation<sup>1</sup>, single housing  
191 should be avoided under experimental conditions if possible. Furthermore, it is arguable  
192 whether choice decisions of individually kept animals can be transferred one-to-one to  
193 animals in a social group resembling realistic laboratory conditions<sup>31</sup>. Thus, we decided  
194 against testing individual animals and used the option of the home cage based choice  
195 experiment to study the mice as socially living animals within the group<sup>37</sup>. Furthermore, in  
196 addition to analyzing the results of all mice over the total test duration of 46 h, we subdivided  
197 the results into an active phase (dark) and inactive phase (light) of the mice<sup>4,38</sup>. This served to  
198 evaluate possible preferences associated with active (e.g., climbing, gnawing) or inactive  
199 (e.g., sleeping, resting) behaviors of the enrichment items by the mice.

200 To investigate whether the mice agreed in their choice of preference we calculated a  
201 consensus error to display the amount of disagreement. Low scores indicated a high  
202 agreement, whereas high scores reflect a low agreement. Evaluation at the level of all mice of  
203 the three groups revealed a high average consensus error in all analyses and thus a lower  
204 agreement in choice, indicating different perceptions of enrichment within a group of mice.  
205 The individual group analysis showed that the rank positions of the tested enrichment  
206 elements varied greatly within their categories, which resulted in a high consensus error in  
207 total. Our assessment of follow and influence rates showed that this cannot be explained by  
208 dominance and following behavior. Therefore, the social dynamics underlying choice within a  
209 group are deemed to be more complex. In addition, the test items were freely available  
210 through the preference test, so the mice may not have perceived the test as forcing them to  
211 choose one or the other. This consideration is probably of greater importance if the difference  
212 in attractiveness between the objects is not very large. Indeed, it the CE is larger in rankings  
213 with low valence ranges compared to large valence ranges in the data provided with the R-  
214 package `SimsalRbim`<sup>34</sup>.

215 *Foraging enrichments* were ranked with closely spaced worth values in all  
216 assessments. Only the lattice ball stands out with a high worth value, both at the group level  
217 and at the overall level. This is also reflected in the consensus error, which was the lowest in  
218 all calculations for the entire period at 29.17 % (CE in 46 h of all mice). Unlike the other  
219 enrichment items in the same category, the lattice ball was attached to the cage top using a  
220 metal ball chain, while the tube with stones, the flappuzzle, the slidingpuzzle, and the treatball  
221 were placed on the floor, resulting in high visual and functional differences. Due to the fact  
222 that after pulling paper out of the ball and eating the millet, the mice were still able to interact  
223 with the ball as a moving object to gnaw at or to climb on, it might have been more interesting  
224 and hence preferred to interact with. Moreover, mice used the pulled-out paper strips from the  
225 grid ball as additional nesting material (data not shown, observation during cleaning process)  
226 and combining different materials for nestbuilding has already been found to be common in  
227 mice<sup>39,40</sup>. Indeed, nesting material is highly valued by mice<sup>41,42</sup> and the motivation to build  
228 nests is strong<sup>43,44</sup>. The direct association of the lattice ball with supplementary nesting  
229 material may explain the preference for this side of the testing system also during the inactive  
230 phase of the mice. Our parallel study investigating the use of the lattice ball in the home cage  
231 showed that the active interaction with this design element was less frequent than with other  
232 foraging elements of the same category during the active phase (Hobbiesiefken et al., subm.  
233<sup>45</sup>). However, in that study the use was evaluated by direct observation during a 30-minute  
234 period in the presence of other enrichment elements from other categories. In the present  
235 study the data was obtained over two circadian cycles in a binary choice test which might be  
236 more conclusive with regard to the overall attractiveness. The elements ‘Treatball’,  
237 ‘slidingpuzzle’, ‘flappuzzle’, and the ‘tube filled with stones’ led to inconclusive worth values  
238 and thus low ranking positions in the evaluation at individual group and overall level.  
239 Nevertheless, they might serve as cognitive stimulation for mice and enable natural behaviors  
240 like burrowing and foraging. This is especially true when considering the high active usage  
241 while the elements were filled with millet seeds as additional treats.

242 *Structural elements* did also not reveal a complete unequivocally ranking which is  
243 again indicated by high values for the consensus error. However, within this category the  
244 second plane and the rope were highly ranked during both the active and inactive time of the  
245 mice. The second plane serves as a climbing element as well as for gnawing and as a refuge  
246 and sleeping place. The multifunctionality offers a wider range of possibilities for interaction  
247 compared to simpler climbing enrichments (i.e., mouseswing, clip with paper or plastic tube,  
248 rope). This is supported by a high rate of use of the second plane which we found in a  
249 comparative behavioral analysis (Hobbiesiefken et al., subm.<sup>45</sup>). Leach et al.<sup>46</sup> also  
250 acknowledged a platform-like insert for mouse cages as an appealing enrichment element for  
251 mice with its dual function as a resting place and as an object that encourages exploration,  
252 jumping, and hiding. In addition, we observed that mice frequently built their nests under the  
253 second plane, both, during the previous housing period as well as under the test conditions.  
254 The other structural enrichment, also preferred, was the rope. However, the evaluation of  
255 short-term usage in a previous study revealed this item, along with other climbing  
256 enrichments that were fixed at the cage top, to be less used when it was presented in a  
257 combination of enrichments (Hobbiesiefken et al., subm.<sup>45</sup>). The rope was made of hemp and  
258 similar to the paper strips derived from the lattice ball, fragments of gnawed hemp ropes were  
259 used as additional nesting material. Therefore, the known attractiveness of nesting material  
260<sup>41,42</sup> and the strong motivation to build nests<sup>43,44</sup> might explain the high rank of the rope. This  
261 again shows that long-term observations are helpful to obtain more conclusive information  
262 about the overall attractiveness of the respective enrichment elements. Gjendal et al.<sup>47</sup> found  
263 hemp ropes to strengthen the participation in social behavior and encouraging climbing and  
264 gnawing behavior in male mice without adverse effects on anxiety levels, stress and



265 aggressive behavior. Hemp ropes can therefore be applied as a simple and inexpensive  
266 enrichment for mice and serve as climbing, gnawing, and supplemental nesting material.

267

268 *Housing enrichment* worth values were closely spaced, with apparent differences  
269 between groups, and elements partially achieving a reversed ranking. Accordingly, the  
270 consensus errors were considerably high for the overall rating of housing enrichment.  
271 Interestingly, van Loo et al.<sup>30</sup> found a comparable paperhousing to be preferred over a  
272 triangular plastic house. Therefore, we expected the paperhouse to be valued highly more  
273 consistently, however, this could not be confirmed unequivocally in our preference tests.  
274 Indeed, the paperhouse achieved the first ranking place in group 2 but was amongst the last  
275 ranking positions in group 1 and 3. Nonetheless, the paperhouse achieved the second place  
276 rank during the total and during the active time in the overall ranking. Indeed, a video  
277 observation revealed the frequent use of the paperhouse during the active phase of the mice  
278 (Hobbiesiefken et al., subm.<sup>45</sup>). Apparently, the light weight and easily manipulated structure  
279 makes the paperhouse attractive as a movable and changeable object with which the home  
280 cage can be actively configured. The floorhouse was also rated highly in the active phase and  
281 seems to promote behaviors such as climbing, hiding and exploring more strongly. Due to its  
282 platform-like structure, it also offers a larger surface area for these types of behavior.  
283 Conversely, the houseball provides the least surface and was ranked to the lowest positions.  
284 During the inactive phase, no housing enrichment achieved a clear preference and all houses  
285 ranked closely spaced. This supports the hypothesis that nest boxes are also perceived as  
286 important exploration objects for mice rather than a mere refuge and sleeping area<sup>42,48</sup>. This  
287 also shows that when mice are asked about their preference for provided items, the answer  
288 may be based on a different way of using these items than was expected by the experimenter.  
289 In general, mice prefer a cage with a nest box to a cage without a nest box<sup>48</sup>. Provision of nest  
290 boxes and nesting material increases animal welfare without negatively impacting data  
291 variability<sup>15</sup>. Therefore, nesting material and nest boxes should be provided as a standard  
292 enrichment in mice<sup>3</sup>. Since the nest box serves more than just shelter, the choice of design  
293 should also take into account the activity-promoting effect of the housing enrichment.  
294 Therefore, factors such as additional space or the changeable structure make the floorhouse  
295 and paperhouse recommended.

296 To determine the effectiveness of enrichment items, it is essential not only to conduct  
297 preference tests, but also to examine the ways in which enrichment items are used<sup>21</sup>.  
298 Evaluation of the type and amount of interaction via behavioral analysis is therefore deemed  
299 an important component to create more species-appropriate housing conditions for mice  
300 (Hobbiesiefken et al., subm.<sup>45</sup>). Although we cannot provide a statement about the  
301 motivational strength<sup>4,23,49</sup>, the experimental design used here allows ranking of the different  
302 design elements. Determination of motivational strength can be achieved through consumer  
303 demand tests and represents the price an individual is willing to pay for access to certain  
304 enrichment elements<sup>4,20,24</sup>. Nevertheless, our study shows that when mice have a say,  
305 judgments about a reasonable type of enrichment can be made in a somewhat more fact-based  
306 manner.

307 Overall, the high consensus errors in our study, especially for housing and structural  
308 enrichment, reflects individual differences in the assessment of the different enrichment  
309 elements from the perspective of each mouse. It should also be borne in mind that objects that  
310 are very similar cannot always be clearly distinguished from each other in terms of their  
311 valence<sup>34</sup>. However, the fact that not all animals have always made a clear choice does not in  
312 any way indicate in principle that enrichment is superfluous. On the contrary, a  
313 comprehensive body of literature<sup>2,3,14–16,21,4,6–11,13</sup> shows positive effects of enrichment. From

314 our study, in addition to practical recommendations, we can also derive the possibility of  
315 using different enrichment elements as a means of variation.

316 Indeed, to create an interesting and stimulating living environment for mice, it is important to  
317 provide variety through regular exchanges. Varied housing can help prevent behavioral  
318 deprivation<sup>50,51</sup> and behavioral disorders<sup>52</sup> in laboratory animals by enabling species-specific  
319 behaviors. Furthermore boredom in laboratory animals<sup>53,54</sup> in its severe chronic forms shares  
320 symptoms with learned helplessness and depression and should therefore be treated as an  
321 important animal welfare concern<sup>55</sup>. It should be the ambition of every experimenter to  
322 improve the well-being of laboratory animals and thus enhance the quality of animal  
323 experiments<sup>56</sup>. Legal husbandry regulations<sup>1</sup> should indeed be considered as a minimum  
324 requirement that does not place an upper limit on the genuine improvement of living  
325 conditions of laboratory animals<sup>22</sup>.

326

## 327 **Conclusions**

328 In our study, preferences for different enrichment items were elicited in female C57BL/6J  
329 mice using a home cage based preference test system. This easy-to-use method for obtaining  
330 information on worth values for different enrichment items for mice facilitates decisions on  
331 the use of enrichment in laboratory husbandry. We show that mice discriminate between  
332 different enrichment items, although not all animals always agree.

333 As foraging enrichment, the lattice ball with its multifunctional character of activity  
334 stimulation and its content of paper strips as additional nesting material achieved high worth  
335 values. A rope made of hemp is also highly valued as a structural element for climbing,  
336 gnawing, and providing additional nesting material. A wooden second plane was also favored  
337 as a structural enrichment, being used both as a resting place and for active engagement. No  
338 clear preferences were found for the type of housing during the inactive period of the mice.  
339 However, the houses serve more than just for sleeping, so structure-creating as well as  
340 manipulable houses are rated as advantageous.

341 High consensus errors within the studied rankings suggest a strong individuality in the  
342 perception of the enrichment elements. Therefore, a multifaceted enrichment approach should  
343 be considered to meet the needs of individual mice. Variation of enrichment elements also  
344 serves as a countermeasure to boredom, which can easily develop in small monotonous  
345 housing environments and lead to behavioral abnormalities. Increasing the complexity of  
346 housing for laboratory mice toward a more stimulating environment allows them to exhibit a  
347 more species-specific behavioral repertoire, potentially leading to more reliable animal  
348 models in biomedical research.

349

## 350 **Materials and Methods**

### 351 *Ethical approval*

352 All experiments were approved by the Berlin state authority, Landesamt für Gesundheit und  
353 Soziales, under license No. G 0069/18 and were in accordance with the German Animal  
354 Protection Law (TierSchG, TierSchVersV). The study was pre-registered in the Animal Study  
355 Registry (ASR, DOI 10.17590/asr.0000162).

### 357 *Animals and housing condition*

358 Twelve female C57BL/6J mice were purchased from Charles River Laboratories, Research  
359 Models and Services, Germany GmbH (Sulzfeld). The sample size was chosen to ensure a  
360 statistical power of 80 % and an alpha value of 0.05. Due to the exploratory experimental  
361 approach, the effect size is unknown and had to be estimated on the basis of published studies  
362 with comparable experimental designs as well as own experiments from our laboratory. The  
363 mice were 7- 8 weeks of age upon arrival in the animal facilities. Mice were randomly  
364 allocated to groups of four animals in Makrolon type III cages by a researcher not involved in  
365 the experiment; animals were alternately assigned to the groups (1,2,3) to avoid bias. During  
366 the first three weeks the animals were housed in groups of four animals in type III Makrolon  
367 cages (L x W x H: 425 x 265 x 150 mm, Tecniplast, Italy) with aspen bedding material (Polar  
368 Granulate 2-3 MM, Altromin), paper (cellulose paper unbleached 20x20 cm, Lohmann &  
369 Rauscher International GmbH & CO KG) and cotton roll nesting material (dental cotton roll  
370 size 3, MED-COMFORT), a 15 cm transparent plexiglas tube (Ø 4cm PMMA xt®, Gehr®)  
371 and a red triangle plastic house (mouse house, TECNIPLAST®). They were provided with  
372 regular rodent food (autoclaved pellet diet, LAS QCDiet, Rod 16, Lasvendi, Germany) and  
373 tap water *ad libitum*. Room temperature was maintained at 22 °C (+/- 2), room humidity at 55  
374 % (+/- 15) and a 12/12 light/dark cycle regimen (lights off 20:00) with simulated sunrise  
375 between 7:30 and 8:00 using a Wake-up light (HF3510, Philips, Germany). To further  
376 implement refinement procedures according to the 3Rs<sup>57</sup> all mice were trained to tunnel  
377 handling<sup>58</sup> daily during the habituation phase and tunnel handling was used throughout the  
378 whole experiment.

379 At the age of eleven weeks mice were provided with cage enrichment. Cages were cleaned  
380 weekly and each mouse was subjected to a visual health check. The enrichment scheme  
381 consisted of permanently provided items (running disc with mouse igloo, paper nesting,  
382 cotton rolls, Table 2) and five weekly rotating items from structural, housing, nesting and  
383 foraging categories (See Table 2 and 3). These enrichment items were randomly exchanged  
384 during the weekly cage cleaning. Randomization of the enrichment combination was done  
385 with the use of the function randomize() in the software R (version 4.0.4). To motivate the  
386 mice in solving the riddles of the foraging enrichment category, a small amount of millet  
387 seeds was provided in the morning inside the riddle during the daily animal inspection. Prior  
388 to the preference experiments, the mice were used in another experiment (Hobbiesiefken et al.  
389 subm.<sup>45</sup>) but stayed in the above-mentioned housing conditions.

390

391

392

393

394

395

396

397 **Table 2: Used enrichment items**

| <b>deployment</b>                                             | <b>enrichment item</b>                                                                                       |                                                                                      |
|---------------------------------------------------------------|--------------------------------------------------------------------------------------------------------------|--------------------------------------------------------------------------------------|
| <b>standard house in MoPSS experiment</b>                     | <b>triangular house</b><br>(mouse house, TECNIPLAST®)                                                        |    |
| <b>housing used in husbandry period</b>                       | <b>running wheel</b><br>(fast-trac + mouse igloo, Bio-Serv®)                                                 |   |
| <b>permanently available (husbandry and MoPSS experiment)</b> | <b>paper nesting</b><br>(cellulose paper unbleached 20x20 cm, Lohmann & Rauscher International GmbH & CO KG) |  |
|                                                               | <b>cotton roll</b><br>(dental cotton roll size 3, MED-COMFORT)                                               |  |
| <b>nesting used in husbandry period in home cage</b>          | <b>fine wood wool</b><br>(H0234-NBF, ABEDD®)                                                                 |  |

|  |                                                                                            |                                                                                                                                                                                                                                    |
|--|--------------------------------------------------------------------------------------------|------------------------------------------------------------------------------------------------------------------------------------------------------------------------------------------------------------------------------------|
|  | <p><b>coarse wood wool</b><br/>(H0234-NBU,<br/>ABEDD®)</p>                                 |  A photograph showing several pieces of coarse wood wool, which are light-colored, fibrous, and irregularly shaped, scattered on a dark surface. |
|  | <p><b>square hemp pads</b><br/>(H3279-10 eco- hemp,<br/>ssniff Spezialdiäten<br/>GmbH)</p> |  A photograph showing four square hemp pads, which are light brown, fibrous, and rectangular, arranged on a dark surface.                        |
|  | <p><b>folded paper strips</b><br/>(sizzlenest®, datesand<br/>Ltd)</p>                      |  A photograph showing a pile of folded paper strips, which are light brown, fibrous, and irregularly shaped, scattered on a dark surface.        |
|  | <p><b>mid coarse wood wool</b><br/>(NBGE012,<br/>ABEDD®)</p>                               |  A photograph showing a pile of mid coarse wood wool, which is light-colored, fibrous, and irregularly shaped, scattered on a dark surface.     |

398

399

400

401 **Table 3. Tested enrichment items**

| category       | enrichment item                                            |                                                                                      |
|----------------|------------------------------------------------------------|--------------------------------------------------------------------------------------|
| <b>housing</b> | <b>houseball</b><br>(crawlball, Bio-Serv®)                 |    |
|                | <b>floorhouse</b><br>(safe harbor, Bio-Serv®)              |    |
|                | <b>paperhouse</b><br>(LBS Serving Biotechnology)           |   |
|                | <b>wooden angle</b><br>(climbing roof, ABEDD®)             |  |
|                | <b>holed wooden angle</b><br>(holed climbing roof, ABEDD®) |  |

|                   |                                                                                                                 |                                                                                      |
|-------------------|-----------------------------------------------------------------------------------------------------------------|--------------------------------------------------------------------------------------|
| <b>structural</b> | <p><b>second plane, 1 hole</b><br/>(1 hole lying boards for cage type III, ABEDD®)</p>                          |    |
|                   | <p><b>second plane, 2 holes</b><br/>(2 hole lying boards for cage type III, ABEDD®)</p>                         |    |
|                   | <p><b>clip with paper tube</b><br/>(38 x 1.25 x 75 mm play tunnel and tunnel clip, Datesand Ltd)</p>            |    |
|                   | <p><b>clip with plastic tube</b><br/>(Plexiglas tube transparent 70mm Ø, KUS and tunnel clip, Datesand Ltd)</p> |  |
|                   | <p><b>mouseswing</b><br/>(single mouse swing, Datesand Ltd)</p>                                                 |  |
|                   | <p><b>mouseswing double</b><br/>(double mouse swing, Datesand Ltd)</p>                                          |  |
|                   | <p><b>rope</b><br/>(jute yarn 6-ply, 6mm, Rayher 4200531)</p>                                                   |  |

|                 |                                                                                                                                                        |                                                                                      |
|-----------------|--------------------------------------------------------------------------------------------------------------------------------------------------------|--------------------------------------------------------------------------------------|
| <b>foraging</b> | <p style="text-align: center;"><b>treatball</b><br/>(self-designed and printed with Filament world PLA 2,85 mm, Ultimaker extended 3)</p>              |    |
|                 | <p style="text-align: center;"><b>slidingpuzzle</b><br/>(Interactive Smart Toy, Living World® green)</p>                                               |    |
|                 | <p style="text-align: center;"><b>tube with stones</b><br/>(mouse tunnel, Bio-Serv® and white marble pebbles 15 – 25 mm Ø, Min2C Natural Minerals)</p> |    |
|                 | <p style="text-align: center;"><b>latticeball with metal chain</b><br/>(Hol-ee Roller® size mini, JW®)</p>                                             |  |
|                 | <p style="text-align: center;"><b>flappuzzle</b><br/>(self-designed and printed with Filament world PLA 2,85 mm, Ultimaker extended 3)</p>             |  |

402

403



## 404 *Animal identification*

405 For individual animal identification, all animals were provided with a microchip transponder  
406 (ISO 11784/85, FDX-B transponders, Planet ID®) under the skin of the dorsal neck region in  
407 rostro caudal implantation direction. This procedure took place at the age of 9-10 weeks under  
408 general isoflurane anaesthesia and pain reliever (Metacam ®).

409 Additionally, all mice were color-coded weekly on the tail with a permanent marker  
410 (Edding® 750) to distinguish them in video observations.

411

## 412 *Preference testing*

413 After 43 weeks in the enriched housing condition, preference tests were conducted using the  
414 Mouse Positioning and Surveillance System (MoPSS)<sup>31</sup>. The system consisted of two  
415 macrolon type III cages, connected with a 30 cm plexiglas tube. Two circular RFID antennas  
416 were attached outside the tube. Inside the tube, plastic barriers were installed in order to slow  
417 down mouse movement (see Figure 4). The RFID antennas were connected to a reader, which  
418 recorded the mouse movements between the left and right cage through detection of the  
419 implanted microchip.

420 The mice remained in their group of four animals and three preference systems were used in  
421 parallel. The systems were positioned in a row on a steel table (see Figure 5: Experimental  
422 setup), in an experimental room with the same environmental conditions as during the  
423 housing period.

424 To achieve same lightning conditions for the left and right cage of the preference system, four  
425 LED lights (Brennenstuhl® Dinora 5000 Baustrahler 47 W 5000 lm Tageslicht-Weiß  
426 1171580) on tripods were set up pointing towards the ceiling. Light intensity in both test  
427 cages was checked with a lux meter (voltcraft® light meter MS-1300).

428 The testing cages were outfitted with 150 g aspen bedding (Polar Granulate 2-3 MM,  
429 Altromin), a red translucent triangular plastic house, three uncolored paper towels, two cotton  
430 rolls, and water and rodent food (autoclaved pellet diet, LAS QCDiet, Rod 16, Lasvendi,  
431 Germany) *ad libitum* with same amount on each side (see Table 2 for equipment details).  
432 Enrichment items placed into the cages were visible so that a full blinded design was not  
433 achievable. However, the automated recording of the behavioral data in the absence of the  
434 experimenter excluded any possible influence.

435 Enrichment items of one category each were randomly presented twice for 23 hours starting at  
436 10:00 am until 9:00 am the following day. Between the two sessions using the same items, the  
437 enrichment items were switched between the cages to counterballance possible side  
438 preferences. In addition also the nesting material and bedding was mixed between the left and  
439 right cage and the mice were supplied with their daily amount of millet seeds. The first  
440 category tested was the ‘structural enrichments’ followed by the ‘foraging enrichments’ and  
441 the ‘housing enrichments’. Two days before the first preference test, the mice were introduced  
442 to the experimental setup including the MoPSS for habituation purpose. After completion of  
443 the experiments in this work, the animals remained in their housing conditions and were used  
444 for further studies.

445

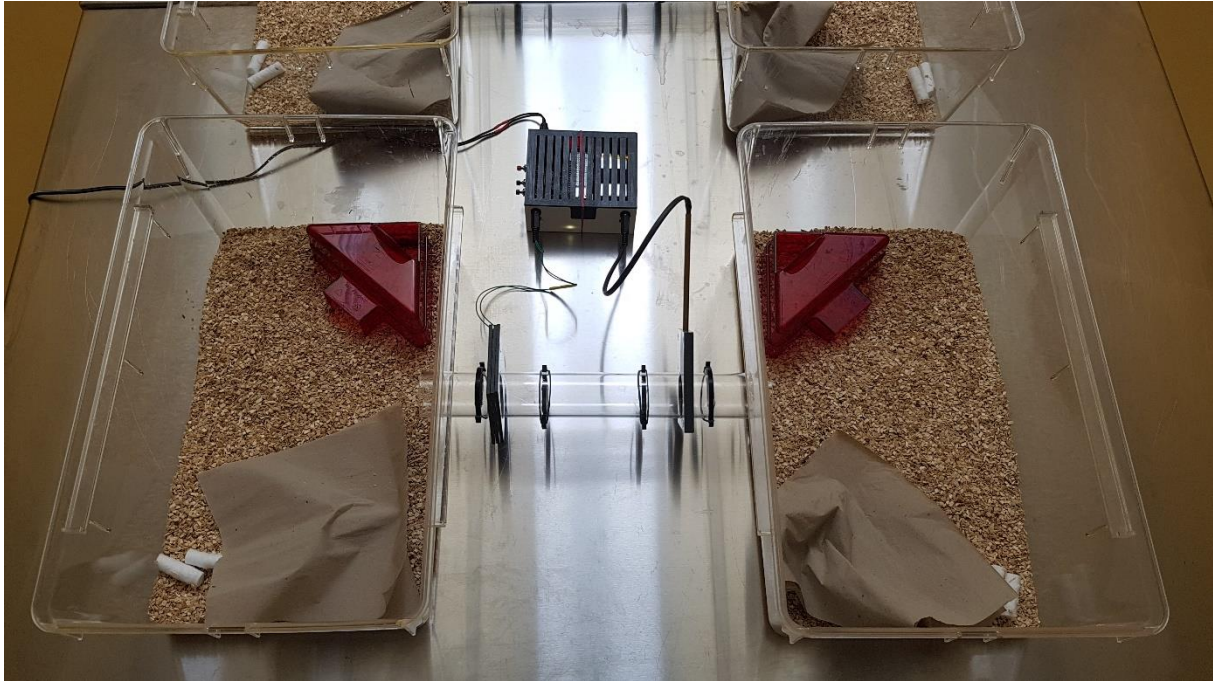

446

447 **Figure 4. The Mouse Positioning and Surveillance System (MoPSS)**

448

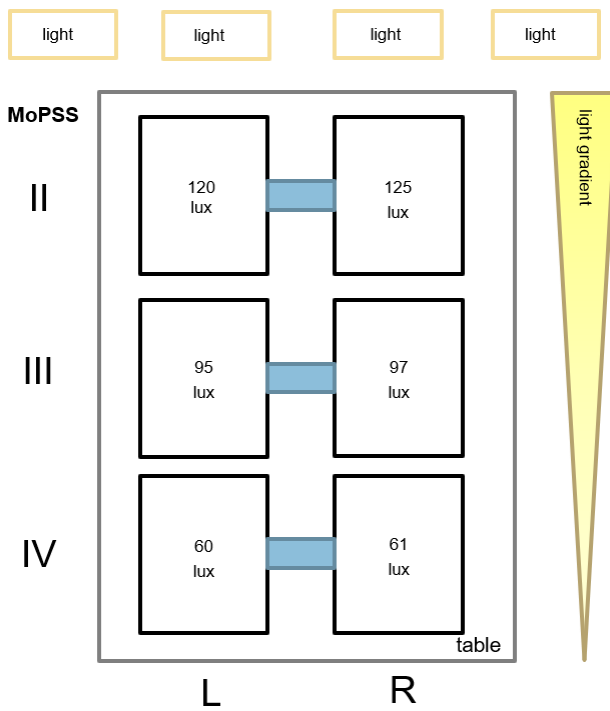

449

450 **Figure 5. Experimental setup**

451

## 452 *Analysis of preference*

453 The mouse tag detections were automatically saved onto a microSD card during the  
454 experiment and each detection was marked by a current timestamp with the antenna number  
455 (left/right) and the individual mouse RFID tag number. Data analysis and sanity checks with  
456 logical correction of missing detections were done using a data evaluation script in the  
457 software R (R version 4.0.4, R Studio version 1.3.959) specially developed for MoPSS data  
458 analysis<sup>31</sup>. No missing data were found, all mice were regularly detected and none had to be  
459 excluded from analysis of stay times. Stay times for each of the twelve mice in each cage side  
460 were calculated as times between cage changes when a mouse tag was detected at a new cage.  
461 It has been shown that the time spent in the tube is negligible for preference calculation<sup>31</sup> and  
462 therefore we did not subtract the time spent in the passaging tube. Stay durations over the 46  
463 hours testing period of each single experiment were summed up for each mouse and then  
464 calculated as percentage of the total time. All data was analyzed both at group/cage level and  
465 in relation to the length of stay of all individual mice over the total period of 46 hours and  
466 over the light and dark phase representing the activity phases of the mice. The calculated  
467 percentages of stay durations were then used for comparison of side preferences (left vs. right  
468 cage) for enrichment one and enrichment two including a side switch of the presented items.  
469 The raw data with stay durations in percentage during the whole 46 hours testing period and  
470 divided into the active and inactive time period can be found in the supplementary material  
471 (Supplement: Table 1,2,3).

472 To rank the tested enrichment items regarding the strength of the preference for each item, a  
473 method developed by Hatzinger et al. 2012<sup>33</sup> of combining the multiple single binary choices  
474 to a 'worth value' was performed using R and the package *simsalRbim*<sup>34</sup>. A similar method  
475 was used by Hopper et al. 2019 to determine the worth value of different items of food rated  
476 by a male gorilla<sup>59</sup>. In short, to estimate the position of an item, the 'worth value' of each  
477 enrichment item was calculated based on the *prefmod* package<sup>33</sup> with its fit to a log-linear  
478 Bradley-Terry model (LLBT). The LLBT was specifically made for paired- comparison  
479 testing and estimates a subject's relative 'worth value' for each choice on a preference scale  
480 that sums to 1<sup>33</sup>. Greater preference is represented here by a higher 'worth value'.

481 To determine the agreement amongst the mice regarding the 'worth value' for each ranked  
482 enrichment item and its estimated position on the scale, a consensus error was also calculated  
483 using the *simsalRbim* package<sup>34</sup>. A detailed example of the calculation of the consensus error  
484 can be found on the *simsalRbim* homepage.<sup>34</sup> In brief, the consensus error reflects the extent  
485 of agreement that the mice showed regarding the preference for a certain enrichment in binary  
486 choices over the other tested enrichment items. A value of 0 % points to a perfect agreement  
487 of a ranking position and 100 % indicates a full disagreement of all individual mice. It should  
488 be noted that CE is biased by the number of individuals, with low numbers resulting in CE  
489 being significantly more affected by a single animal. In our presentation of the cage wise  
490 preferences we therefore refrained from calculating the CE as the ratings are based on a  
491 choice of only 4 animals.

492 All analyses were run in R version 4.0.4 using RStudio (Version 1.3.959).

493

## 494 *Sample size*

495 It is debated whether or not group housed animals can unequivocally considered to act  
496 independently in their choice and therefore each cage would have to be considered as one  
497 independent sample<sup>31,35,36,60</sup>. This presents a dilemma because the mice would either have to

498 be housed individually or the total number of experimental animals would have to be  
499 increased by the use of additional cages. As we are explicitly interested in the preference for  
500 enrichment items under common social conditions, housing mice singly was not an option.  
501 With regard to keeping the overall number of experimental animals as low as possible in the  
502 light of the 3Rs, we calculated that 12 mice would be a reasonable sample size if they indeed  
503 act independently. In order to demonstrate that individual preference was an independent  
504 choice, we conducted a follow and influence behavior analysis using R (Version 4.0.4) with  
505 our obtained experimental data from the MoPSS. A *follow event* was defined as a transition of  
506 one mouse directly detected within one second after another mouse. The leading mouse  
507 detected in this constellation received an *influencer event*. We further calculated a *follow rate*  
508 and *influence rate* as follows:

509 
$$\text{follow rate} = \frac{\text{follow events}}{\text{transitions}}$$

510

511 
$$\text{influence rate} = \frac{\text{influence events}}{\text{transitions}}$$

512

513

514

515

## 516 References

- 517 1. The European Parliament & The Council of the European Union. *Directive*  
518 *2010/63/EU of the European Parliament and of the Council of 22 September 2010 on*  
519 *the protection of animals used for scientific purposes.* (2010).
- 520 2. Newberry, R. C. Environmental enrichment: Increasing the biological relevance of  
521 captive environments. *Appl. Anim. Behav. Sci.* **44**, 229–243 (1995).
- 522 3. Olsson, I. A. S. & Dahlborn, K. Improving housing conditions for laboratory mice: A  
523 review of ‘environmental enrichment’. *Lab. Anim.* **36**, 243–270 (2002).
- 524 4. Lewejohann, L. & Sachser, N. Evaluation of different housing conditions for male  
525 laboratory mice by means of preference tests. *KTBL SCHRIFT* 170–177 (2000).
- 526 5. Duncan, I. J. H. & Olsson, I. A. S. Environmental enrichment: from flawed concept to  
527 pseudo-science. in *Proceedings International Congress of th e ISAE 2001, Davis, USA*  
528 (2001).
- 529 6. Hutchinson, E., Avery, A. & VandeWoude, S. Environmental enrichment for  
530 laboratory rodents. *ILAR J.* **46**, 148–161 (2005).
- 531 7. Bailoo, J. D. *et al.* Effects of Cage Enrichment on Behavior, Welfare and Outcome  
532 Variability in Female Mice. *Front. Behav. Neurosci.* **12**, (2018).
- 533 8. Tang, Y. P., Wang, H., Feng, R., Kyin, M. & Tsien, J. Z. Differential effects of  
534 enrichment on learning and memory function in NR2B transgenic mice.  
535 *Neuropharmacology* **41**, 779–790 (2001).
- 536 9. van Praag, H., Kempermann, G. & Gage, F. H. Neural consequences of enviromental  
537 enrichment. *Nat. Rev. Neurosci.* **1**, 191–198 (2000).
- 538 10. Kempermann, G., Kuhn, H. G. & Gage, F. H. More hippocampal neurons in adult mice  
539 living in an enriched environment. *Nature* **386**, 493–495 (1997).
- 540 11. Benaroya-Milshtein, N. *et al.* Environmental enrichment in mice decreases anxiety,  
541 attenuates stress responses and enhances natural killer cell activity. *Eur. J. Neurosci.*  
542 **20**, 1341–1347 (2004).
- 543 12. Bailoo, J. D. *et al.* Effects of Cage Enrichment on Behavior, Welfare and Outcome  
544 Variability in Female Mice. *Front. Behav. Neurosci.* **12**, (2018).
- 545 13. van de Weerd, H. A. *et al.* Effects of Environmental Enrichment for Mice: Variation in  
546 Experimental Results. *J. Appl. Anim. Welf. Sci.* **5**, 125–137 (2002).
- 547 14. André, V. *et al.* Laboratory mouse housing conditions can be improved using common  
548 environmental enrichment without compromising data. *PLoS Biol.* **16**, 1–24 (2018).
- 549 15. Baumans, V., van Loo, P. L. P. & Pham, T. M. Standardisation of environmental  
550 enrichment for laboratory mice and rats: Utilisation, practicality and variation in  
551 experimental results. *Scand. J. Lab. Anim. Sci.* **37**, 101–114 (2010).
- 552 16. Gross, A. N., Richter, S. H., Engel, A. K. J. & Würbel, H. Cage-induced stereotypies,  
553 perseveration and the effects of environmental enrichment in laboratory mice. *Behav.*  
554 *Brain Res.* **234**, 61–68 (2012).
- 555 17. Key, D. Environmental Enrichment Options for Laboratory Rats and Mice. *Lab Anim.*  
556 (NY). **33**, 39–44 (2004).

- 557 18. van de Weerd, H. A. *Environmental Enrichment for Laboratory Rodents: Preferences*  
558 *and Consequences*. (1996).
- 559 19. Baumans, V. Environmental enrichment for laboratory rodents and rabbits:  
560 Requirements of rodents, rabbits, and research. *ILAR J.* **46**, 162–170 (2005).
- 561 20. Dawkins, M. S. From an animal's point of view: Motivation, fitness, and animal  
562 welfare. *Behav. Brain Sci.* **13**, 1–9 (1990).
- 563 21. Baumans, V. & Van Loo, P. L. P. How to improve housing conditions of laboratory  
564 animals: The possibilities of environmental refinement. *Vet. J.* **195**, 24–32 (2013).
- 565 22. Lewejohann, L., Schwabe, K., Häger, C. & Jirkof, P. Impulse for animal welfare  
566 outside the experiment. *Lab. Anim.* **54**, 23677219891754 (2020).
- 567 23. Habedank, A., Kahnau, P., Diederich, K. & Lewejohann, L. Severity assessment from  
568 an animal's point of view. *Berl. Munch. Tierarztl. Wochenschr.* **31**, 304–320 (2018).
- 569 24. Dawkins, M. S. A user's guide to animal welfare science. *Trends Ecol. Evol.* **21**, 77–82  
570 (2006).
- 571 25. Lewejohann, L. *et al.* Environmental bias? Effects of housing conditions, laboratory  
572 environment and experimenter on behavioral tests. *Genes, Brain Behav.* **5**, 64–72  
573 (2006).
- 574 26. Wahlsten, D. *et al.* Different data from different labs: Lessons from studies of gene-  
575 environment interaction. *J. Neurobiol.* **54**, 283–311 (2003).
- 576 27. van Loo, P. L. P., Blom, H. J. M., Meijer, M. K. & Baumans, V. Assessment of the use  
577 of two commercially available environmental enrichments by laboratory mice by  
578 preference testing. *Lab. Anim.* **39**, 58–67 (2005).
- 579 28. Sherwin, C. M. Preferences of laboratory mice for characteristics of soiling sites. *Anim.*  
580 *Welf.* **5**, 283–288 (1996).
- 581 29. Koolhaas, J. M., van Loo, P. L. P., van Zutphen, L. F. M., van de Weerd, H. A. &  
582 Baumans, V. Preferences for nesting material as environmental enrichment for  
583 laboratory mice. *Lab. Anim.* **31**, 133–143 (2007).
- 584 30. van Loo, P. L. P., Blom, H. J. M., Meijer, M. K. & Baumans, V. Assessment of the use  
585 of two commercially available environmental enrichments by laboratory mice by  
586 preference testing. *Lab. Anim.* **39**, 58–67 (2005).
- 587 31. Habedank, A., Urmersbach, B., Kahnau, P. & Lewejohann, L. O mouse, where art  
588 thou? The Mouse Position Surveillance System (MoPSS) - An RFID based tracking  
589 system. *Behav. Res. Methods* 1–23 (2021) doi:10.3758/s13428-021-01593-7.
- 590 32. Mekada, K. *et al.* Genetic differences among C57BL/6 substrains. *Exp. Anim.* **58**, 141–  
591 149 (2009).
- 592 33. Hatzinger, R. ; R. D. pefmod: An R Package for Modeling Preferences Based on  
593 Paired Comparisons, Rankings, or Ratings. *Wiley Interdiscip. Rev. Comput. Stat.* **1**,  
594 128–129 (2012).
- 595 34. Talbot, S., Pfefferle, D., Brockhausen, R. & Lewejohann, L. simsalRbim - A package  
596 for preference test simulations. <https://talbotsr.com/simsalRbim/index.html>.
- 597 35. Parsons, N. R., Teare, M. D. & Sitch, A. J. Unit of analysis issues in laboratory-based

- 598 research. *Elife* **7**, 1–25 (2018).
- 599 36. Bello, N. M. *et al.* Short communication: On recognizing the proper experimental unit  
600 in animal studies in the dairy sciences. *J. Dairy Sci.* **99**, 8871–8879 (2016).
- 601 37. Gaskill, B. N., Rohr, S. A., Pajor, E. A., Lucas, J. R. & Garner, J. P. Some like it hot:  
602 Mouse temperature preferences in laboratory housing. *Appl. Anim. Behav. Sci.* **116**,  
603 279–285 (2009).
- 604 38. Freymann, J., Tsai, P.-P., Stelzer, H. & Hackbarth, H. The amount of cage bedding  
605 preferred by female BALB/c and C57BL/6 mice. *Lab Anim. (NY)*. **44**, 17–22 (2015).
- 606 39. Van de Weerd, H. A., Baumans, V., Koolhaas, J. M. & Van Zutphen, L. F. M. Nesting  
607 material as enrichment in two mouse strains. in *Frontiers in Laboratory Animal*  
608 *Science: Joint International Conference of ICLAS, Scand-LAS and FinLAS* 119–123  
609 (1996).
- 610 40. Van De Weerd, H. A., Van Loo, P. L. P., Van Zutphen, L. F. M., Koolhaas, J. M. &  
611 Baumans, V. Preferences for nesting material as environmental enrichment for  
612 laboratory mice. *Lab. Anim.* **31**, 133–143 (1997).
- 613 41. Roper, T. J. Nesting material as a reinforcer for female mice. *Anim. Behav.* **21**, 733–  
614 740 (1973).
- 615 42. Van De Weerd, H. A., Van Loo, P. L. P., Van Zutphen, L. F. M., Koolhaas, J. M. &  
616 Baumans, V. Strength of preference for nesting material as environmental enrichment  
617 for laboratory mice. *Appl. Anim. Behav. Sci.* **55**, 369–382 (1998).
- 618 43. Deacon, R. M. J. Assessing nest building in mice. *Nat. Protoc.* **1**, 1117–1119 (2006).
- 619 44. Latham, N. & Mason, G. From house mouse to mouse house: the behavioural biology  
620 of free-living *Mus musculus* and its implications in the laboratory. *Appl. Anim. Behav.*  
621 *Sci.* **86**, 261–289 (2004).
- 622 45. Hobbiesiefken, U., Mieske, P., Lewejohann, L. & Diederich, K. Evaluation of different  
623 types of enrichment - their usage and effect on home cage behavior in female mice.  
624 *PloS one* *subm.*
- 625 46. Leach, M. C., Ambrose, N., Howell, V. J. & Morton, D. B. The Development of a  
626 Novel Form of Mouse Cage Enrichment. *J. Appl. Anim. Welf. Sci.* **3**, 81–91 (2000).
- 627 47. Gjendal, K., Sørensen, D. B., Kiersgaard, M. K. & Ottesen, J. L. Hang on: An  
628 evaluation of the hemp rope as environmental enrichment in C57BL/6 mice. *Anim.*  
629 *Welf.* **26**, 437–447 (2017).
- 630 48. Van de Weerd, H. A., Van Loo, P. L. P., Van Zutphen, L. F. M., Koolhaus, J. M. &  
631 Baumans, V. Preferences for nest boxes as environmental enrichment for laboratory  
632 mice. *Anim. WELFARE-POTTERS BAR-* **7**, 11–26 (1998).
- 633 49. Kirkden, R. D. & Pajor, E. A. Using preference, motivation and aversion tests to ask  
634 scientific questions about animals' feelings. *Appl. Anim. Behav. Sci.* **100**, 29–47  
635 (2006).
- 636 50. Dawkins, M. S. Behavioural deprivation: A central problem in animal welfare. *Appl.*  
637 *Anim. Behav. Sci.* **20**, 209–225 (1988).
- 638 51. Mason, G. J. & Burn, C. C. Behavioral Restriction. 98–119 (2011).

- 639 52. Gross, A. N. M., Engel, A. K. J. & Würbel, H. Simply a nest? Effects of different  
640 enrichments on stereotypic and anxiety-related behaviour in mice. *Appl. Anim. Behav.*  
641 *Sci.* (2011) doi:10.1016/j.applanim.2011.06.020.
- 642 53. Meagher, R. K. & Mason, G. J. Environmental Enrichment Reduces Signs of Boredom  
643 in Caged Mink. *PLoS One* **7**, (2012).
- 644 54. Burn, C. C. Bestial boredom: a biological perspective on animal boredom and  
645 suggestions for its scientific investigation. *Anim. Behav.* **130**, 141–151 (2017).
- 646 55. Meagher, R. K. Is boredom an animal welfare concern? *Anim. Welf.* **28**, 21–32 (2019).
- 647 56. Richter, S. H. & von Kortzfleisch, V. Reply to ‘It is time for an empirically informed  
648 paradigm shift in animal research’. *Nat. Rev. Neurosci.* **21**, 661–662 (2020).
- 649 57. Russell, W. & Burch, R. *The principles of Humane Experimental Technique.* (Methuen,  
650 1959).
- 651 58. Hurst, J. L. & West, R. S. Taming anxiety in laboratory mice. *Nat. Methods* **7**, 825–826  
652 (2010).
- 653 59. Hopper, L. M., Egelkamp, C. L., Fidino, M. & Ross, S. R. An assessment of  
654 touchscreens for testing primate food preferences and valuations. *Behav. Res. Methods*  
655 **51**, 639–650 (2019).
- 656 60. Kappel, S., Hawkins, P. & Mendl, M. T. To Group or Not to Group? Good Practice for  
657 Housing Male Laboratory Mice. *Animals* **7**, (2017).

658

## 659 **Acknowledgments**

660 The authors received no specific funding for this work. The work is financed by the annual  
661 budget of The German Federal Institute for Risk Assessment (BfR). BfR reports to the  
662 Federal Ministry of Food and Agriculture (BMEL). The BMEL had no role in study design,  
663 data collection and analysis, decision to publish, or preparation of the manuscript.

664 The manuscript has been published first on bioRxiv  
665 (<https://doi.org/10.1101/2021.10.20.465117>).

666 The authors thank the animal caretakers, especially Carola Schwarck and Lisa Gordijenko, for  
667 their support in the animal husbandry.

## 668 **Authors contribution**

669 All persons who meet authorship criteria are listed as authors, and all authors certify that they  
670 have participated sufficiently in the work to take public responsibility for the content,  
671 including participation in the concept, design, analysis, writing, or revision of the manuscript.

672 Conception and design of study: U.H., K.D., L.L.; acquisition of data: U.H.; analysis and/or  
673 interpretation of data: U.H., B.U., A.J.

674 Drafting the manuscript: U.H.; revising the manuscript critically for important intellectual  
675 content: K.D., L.L.

676 Approval of the version of the manuscript to be published: U.H., B.U., A.J., K.D., L.L.

677



678 **Competing interests**

679 No competing interests exist.

680

681 **Supplementary Material**

682

683 Supplementary Material such as 3D printing templates and raw data tables can be found  
684 under: <https://github.com/DasDritteR/MoPSS-preference-test-supplements>

685
